# Supplementary material
Source: publisher site journal article supplement (http://www.scielo.br/pdf/aabc/v91s2/0001-3765-aabc-91-s2-e20181290-suppl.pdf)
Supplement: Supplementary file 1 [file 0001-3765-aabc-91-s2-e20181290-suppl.pdf]

## SUPPLEMENTARY MATERIAL

| SAMPLE       | TAXON           | OSTEODERM | PIXEL SIZE<br>( $\mu\text{m}$ ) | VOLTAGE<br>(kV) | CURRENT<br>( $\mu\text{A}$ ) | TIME OF<br>ACQUISITION |
|--------------|-----------------|-----------|---------------------------------|-----------------|------------------------------|------------------------|
| UFRJ-DG 317M | Riostegotherium | Movable   | 6.00                            | 50              | 115                          | 1h03min                |
| LMH 06       | Riostegotherium | Movable   | 6.38                            | 45              | 177                          | 55 min                 |
| MCN-PV 1777  | Riostegotherium | Movable   | 6.41                            | 50              | 160                          | 1h37min                |
| MCN-PV 1779  | Riostegotherium | Movable   | 6.41                            | 50              | 160                          | 1h38min                |
| MCT 3932 M   | Riostegotherium | Buckler   | 6.38                            | 45              | 177                          | 55 min                 |
| MCN-PV 1775  | Riostegotherium | Buckler   | 6.41                            | 50              | 160                          | 1h32min                |
| LMH 83.2     | Dasypus         | Movable   | 7.00                            | 45              | 177                          | 1h16min                |
| LMH 83.5     | Dasypus         | Movable   | 5,99                            | 50              | 115                          | 1h03min                |
| LMH 83.6     | Dasypus         | Movable   | 7,48                            | 45              | 177                          | 1h16min                |
| LMH 83.1     | Dasypus         | Buckler   | 6.70                            | 45              | 177                          | 1h15min                |
| LMH 83.7     | Dasypus         | Buckler   | 6,5                             | 45              | 177                          | 1h16min                |
| LMH 98.1     | Dasypus         | Buckler   | 6.41                            | 45              | 160                          | 1h17min                |
| LMH 98.4     | Dasypus         | Buckler   | 6.41                            | 50              | 160                          | 1h15min                |
| LMH 98.5     | Dasypus         | Buckler   | 6.41                            | 50              | 160                          | 1h14min                |
